# Supplementary material for: Efficient adsorption performance of uranium in wastewater by novel MXene material TiVCTx and its aerogel composites
Source: Royal Society of Chemistry journal article supplement (doi:10.1039/d4ra05531d), 2024-01-01
Supplement: d4ra05531d1.pdf [file d4ra05531d1.pdf]

# **Efficient adsorption performance of uranium in wastewater by novel MXene material TiVCT<sub>x</sub> and its aerogel composites**

Xiaoxia Luo<sup>a,\*</sup>, Xianliang Ren<sup>b</sup>, Hongwei Wang<sup>b,\*\*</sup>

<sup>a</sup> Chongqing College of Mobile Communication, Chongqing, 401520, P.R. China

<sup>b</sup> National Key Laboratory of Advanced Casting Technologies, Chongqing Key Laboratory of Soft Condensed Matter Physics and Smart Materials, College of Physics, Chongqing University, Chongqing, 400044, P.R. China

E-mail addresses: 20202701013@cqu.edu.cn (H. Wang); xiaoxialuo90@163.com (X. Luo)

Table S1 Mocledn's artificial seawater formula (salinity 3.34%)

| Chemical formula  | Concentration (g L <sup>-1</sup> ) |
|-------------------|------------------------------------|
| NaCl              | 26.726                             |
| MgCl <sub>2</sub> | 2.26                               |
| MgNO <sub>3</sub> | 5.845                              |
| CaCl <sub>2</sub> | 1.153                              |

Adjusting the pH of a 100 mL, 125 mg/L U(VI) solution solely with NaOH reveals minimal changes in U(VI) concentration across varying pH levels. Only a negligible amount of U(VI) precipitates, hence its effect on adsorption can be disregarded.

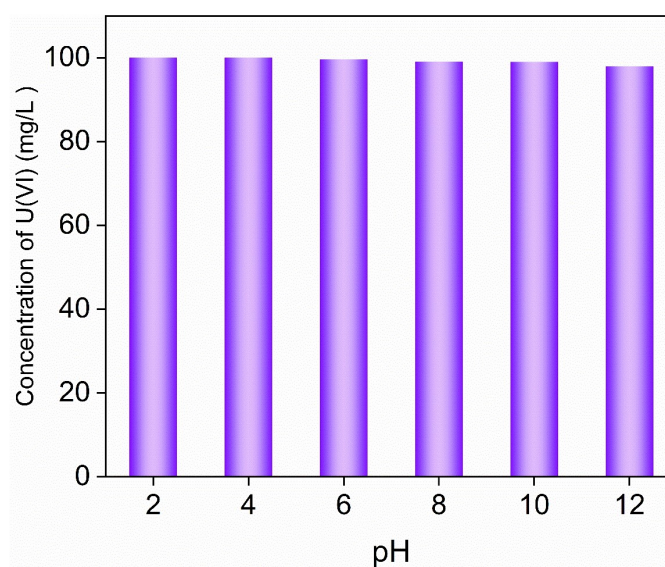

Fig. S1 The influence of NaOH-adjusted pH on U(VI) concentration.
